# Supplementary material for: An unusually high substitution rate in transplant-associated BK polyomavirus in vivo is further concentrated in HLA-C-bound viral peptides
Source: PubMed Central journal article supplement (PMC6207329; doi:10.1371/journal.ppat.1007368), 2018-10-18
Supplement: ppat.1007368.s004.pdf [file ppat.1007368.s004.pdf]

| Locus | Genomic position | Gene position | Reference base | Sample base | Reference amino acid | Sample amino acid | Percentage of samples |
|-------|------------------|---------------|----------------|-------------|----------------------|-------------------|-----------------------|
| NCCR  | 20               |               | G              | T           |                      |                   | 0.44                  |
|       | 20               |               | G              | A           |                      |                   | 2.67                  |
|       | 22               |               | A              | G           |                      |                   | 0.88                  |
|       | 41               |               | G              | T           |                      |                   | 13.78                 |
|       | 57               |               | G              | T           |                      |                   | 0.44                  |
|       | 84               |               | G              | C           |                      |                   | 12.44                 |
|       | 84               |               | G              | T           |                      |                   | 0.44                  |
|       | 85               |               | A              | T           |                      |                   | 3.11                  |
|       | 86               |               | G              | A           |                      |                   | 3.55                  |
|       | 102              |               | A              | C           |                      |                   | 15.11                 |
|       | 102              |               | A              | G           |                      |                   | 0.44                  |
|       | 160              |               | T              | A           |                      |                   | 13.78                 |
|       | 161              |               | A              | T           |                      |                   | 11.56                 |
|       | 165              |               | A              | T           |                      |                   | 1.33                  |
|       | 173              |               | C              | T           |                      |                   | 13.78                 |
|       | 174              |               | A              | G           |                      |                   | 0.44                  |
|       | 184              |               | T              | G           |                      |                   | 0.88                  |
|       | 193              |               | G              | A           |                      |                   | 17.78                 |
|       | 197              |               | G              | C           |                      |                   | 4.44                  |
|       | 197              |               | G              | T           |                      |                   | 0.88                  |
|       | 198              |               | A              | C           |                      |                   | 4.88                  |
|       | 208              |               | A              | G           |                      |                   | 0.44                  |
|       | 211              |               | G              | T           |                      |                   | 1.33                  |
|       | 217              |               | C              | G           |                      |                   | 6.22                  |
|       | 236              |               | A              | G           |                      |                   | 8.89                  |
|       | 239              |               | G              | A           |                      |                   | 0.44                  |
|       | 253              |               | A              | G           |                      |                   | 81.33                 |
|       | 255              |               | A              | C           |                      |                   | 4.89                  |
|       | 261              |               | C              | T           |                      |                   | 1.78                  |
|       | 261              |               | C              | G           |                      |                   | 0.44                  |
|       | 274              |               | G              | A           |                      |                   | 0.44                  |
|       | 283              |               | G              | C           |                      |                   | 0.44                  |
|       | 287              |               | C              | G           |                      |                   | 10.67                 |
|       | 289              |               | G              | A           |                      |                   | 12.00                 |
|       | 290              |               | G              | T           |                      |                   | 4.89                  |
|       | 297              |               | G              | T           |                      |                   | 0.44                  |
|       | 310              |               | C              | A           |                      |                   | 0.44                  |
|       | 317              |               | G              | A           |                      |                   | 1.78                  |
|       | 342              |               | A              | G           |                      |                   | 63.56                 |
|       | 346              |               | T              | G           |                      |                   | 11.56                 |

|                    |     |     |   |   |   |   |       |
|--------------------|-----|-----|---|---|---|---|-------|
|                    | 348 |     | G | A |   |   | 4.89  |
|                    | 353 |     | C | T |   |   | 1.33  |
|                    | 353 |     | C | G |   |   | 0.88  |
|                    | 362 |     | G | T |   |   | 0.44  |
|                    | 364 |     | C | G |   |   | 1.33  |
|                    | 377 |     | G | T |   |   | 0.44  |
|                    | 386 |     | C | G |   |   | 1.33  |
| <b>Agnoprotein</b> | 394 | 7   | C | G | L | V | 3.11  |
|                    | 396 | 9   | G | A | L | L | 12.44 |
|                    | 398 | 11  | G | T | R | L | 0.89  |
|                    | 410 | 23  | G | A | R | Q | 2.22  |
|                    | 412 | 25  | C | G | Q | E | 0.44  |
|                    | 420 | 33  | A | T | S | S | 92.44 |
|                    | 427 | 40  | G | A | V | I | 4.89  |
|                    | 427 | 40  | G | C | V | L | 64.0  |
|                    | 429 | 42  | T | A | V | V | 0.89  |
|                    | 430 | 43  | G | A | G | S | 25.33 |
|                    | 443 | 56  | C | G | T | S | 0.44  |
|                    | 446 | 59  | G | A | G | E | 0.44  |
|                    | 450 | 63  | A | T | T | T | 16.0  |
|                    | 455 | 68  | A | G | K | R | 0.89  |
|                    | 458 | 71  | G | C | R | T | 2.67  |
|                    | 459 | 72  | A | G | R | R | 0.44  |
|                    | 463 | 76  | C | G | Q | E | 0.44  |
|                    | 465 | 78  | G | C | Q | H | 3.11  |
|                    | 472 | 85  | T | C | F | L | 11.11 |
|                    | 479 | 92  | T | A | F | Y | 0.44  |
|                    | 487 | 100 | G | C | E | Q | 0.44  |
|                    | 487 | 100 | G | T | E | * | 0.44  |
|                    | 496 | 109 | C | G | L | V | 0.44  |
|                    | 499 | 112 | G | A | E | K | 0.44  |
|                    | 499 | 112 | G | C | E | Q | 0.44  |
|                    | 506 | 119 | G | T | C | F | 1.78  |
|                    | 507 | 120 | T | G | C | W | 0.89  |
|                    | 509 | 122 | G | A | R | K | 0.44  |
|                    | 514 | 127 | G | A | E | K | 11.11 |
|                    | 515 | 128 | A | T | E | V | 0.44  |
|                    | 520 | 133 | A | G | S | G | 0.44  |
|                    | 522 | 135 | T | G | S | R | 0.44  |
|                    | 523 | 136 | G | A | V | I | 4.89  |
|                    | 526 | 139 | G | A | D | N | 0.44  |

|                   |      |           |   |   |       |       |       |
|-------------------|------|-----------|---|---|-------|-------|-------|
|                   | 529  | 142       | G | T | G     | W     | 0.44  |
|                   | 553  | 166       | T | G | L     | V     | 10.22 |
|                   | 566  | 179       | A | G | K     | R     | 0.44  |
|                   | 585  | 198       | C | A | S     | S     | 0.44  |
| <b>Intergenic</b> | 598  |           | C | G |       |       | 5.33  |
|                   | 604  |           | T | G |       |       | 0.44  |
|                   | 623  |           | C | G |       |       | 87.11 |
| <b>VP2</b>        | 734  | 111       | T | C | A     | A     | 4.89  |
|                   | 738  | 115       | G | C | E     | Q     | 0.44  |
|                   | 759  | 136       | G | T | A     | S     | 0.89  |
|                   | 781  | 158       | G | C | S     | T     | 4.89  |
|                   | 815  | 192       | T | A | T     | T     | 4.89  |
|                   | 837  | 214       | G | A | A     | T     | 0.44  |
|                   | 848  | 225       | T | A | P     | P     | 19.11 |
|                   | 875  | 252       | A | G | L     | L     | 4.0   |
|                   | 878  | 255       | T | C | I     | I     | 0.44  |
|                   | 879  | 256       | C | G | Q     | E     | 0.44  |
|                   | 889  | 266       | G | C | S     | T     | 94.67 |
|                   | 902  | 279       | C | T | S     | S     | 18.22 |
|                   | 905  | 282       | A | G | L     | L     | 99.11 |
|                   | 922  | 299       | A | G | K     | R     | 92.89 |
|                   | 926  | 303       | C | T | F     | F     | 79.11 |
|                   | 930  | 307       | G | A | D     | N     | 73.78 |
|                   | 930  | 307       | G | T | D     | Y     | 11.56 |
|                   | 931  | 308       | A | G | D     | G     | 74.22 |
|                   | 965  | 342       | C | T | L     | L     | 19.11 |
| <b>VP2 / VP3</b>  | 986  | 363 / 6   | T | A | A / A | A / A | 10.22 |
|                   | 990  | 367 / 10  | G | C | E / E | Q / Q | 0.44  |
|                   | 1008 | 385 / 28  | G | C | E / E | Q / Q | 0.44  |
|                   | 1022 | 399 / 42  | T | A | I / I | I / I | 66.67 |
|                   | 1023 | 400 / 43  | C | T | L / L | L / L | 94.67 |
|                   | 1049 | 426 / 69  | T | A | V / V | V / V | 94.67 |
|                   | 1064 | 441 / 84  | C | T | Y / Y | Y / Y | 4.89  |
|                   | 1067 | 444 / 87  | T | A | L / L | L / L | 18.67 |
|                   | 1091 | 468 / 111 | T | C | S / S | S / S | 11.56 |
|                   | 1109 | 486 / 129 | C | T | S / S | S / S | 72.44 |
|                   | 1133 | 510 / 153 | G | A | R / R | R / R | 4.89  |
|                   | 1146 | 523 / 166 | T | G | S / S | A / A | 94.67 |
|                   | 1154 | 531 / 174 | C | T | T / T | T / T | 17.33 |
|                   | 1160 | 537 / 180 | G | A | Q / Q | Q / Q | 93.78 |
|                   | 1169 | 546 / 189 | G | A | Q / Q | Q / Q | 93.78 |

|      |           |   |   |       |       |       |
|------|-----------|---|---|-------|-------|-------|
| 1172 | 549 / 192 | A | G | R / R | R / R | 4.0   |
| 1175 | 552 / 195 | A | G | R / R | R / R | 1.78  |
| 1181 | 558 / 201 | A | G | E / E | E / E | 13.33 |
| 1187 | 564 / 207 | T | C | F / F | F / F | 13.33 |
| 1193 | 570 / 213 | A | G | R / R | R / R | 4.44  |
| 1199 | 576 / 219 | C | T | S / S | S / S | 4.44  |
| 1217 | 594 / 237 | G | A | E / E | E / E | 19.56 |
| 1223 | 600 / 243 | T | A | T / T | T / T | 1.33  |
| 1223 | 600 / 243 | T | C | T / T | T / T | 4.89  |
| 1232 | 609 / 252 | A | C | T / T | T / T | 5.78  |
| 1248 | 625 / 268 | A | G | I / I | V / V | 13.78 |
| 1250 | 627 / 270 | A | G | I / I | M / M | 2.22  |
| 1271 | 648 / 291 | A | G | Q / Q | Q / Q | 11.56 |
| 1272 | 649 / 292 | C | G | Q / Q | E / E | 95.11 |
| 1274 | 651 / 294 | A | T | Q / Q | H / H | 12.0  |
| 1284 | 661 / 304 | G | A | D / D | N / N | 0.44  |
| 1287 | 664 / 307 | C | T | L / L | L / L | 6.22  |
| 1289 | 666 / 309 | T | G | L / L | L / L | 8.89  |
| 1304 | 681 / 324 | C | T | P / P | P / P | 17.33 |
| 1306 | 683 / 326 | C | T | S / S | L / L | 0.44  |
| 1313 | 690 / 333 | T | C | V / V | V / V | 0.44  |
| 1316 | 693 / 336 | A | G | R / R | R / R | 17.33 |
| 1322 | 699 / 342 | A | T | V / V | V / V | 12.89 |
| 1322 | 699 / 342 | A | G | V / V | V / V | 12.0  |
| 1326 | 703 / 346 | G | A | E / E | K / K | 1.33  |
| 1337 | 714 / 357 | T | A | G / G | G / G | 11.11 |
| 1342 | 719 / 362 | G | A | R / R | H / H | 5.33  |
| 1344 | 721 / 364 | G | T | V / V | L / L | 0.44  |
| 1347 | 724 / 367 | C | A | H / H | N / N | 5.33  |
| 1361 | 738 / 381 | T | C | T / T | T / T | 14.67 |
| 1364 | 741 / 384 | T | C | Y / Y | Y / Y | 14.67 |
| 1367 | 744 / 387 | T | A | S / S | R / R | 12.0  |
| 1367 | 744 / 387 | T | C | S / S | S / S | 4.44  |
| 1374 | 751 / 394 | G | A | D / D | N / N | 0.44  |
| 1374 | 751 / 394 | G | C | D / D | H / H | 1.78  |
| 1380 | 757 / 400 | G | A | D / D | N / N | 0.89  |
| 1389 | 766 / 409 | G | A | E / E | K / K | 0.89  |
| 1389 | 766 / 409 | G | C | E / E | Q / Q | 13.33 |
| 1392 | 769 / 412 | G | A | E / E | K / K | 0.44  |
| 1400 | 777 / 420 | A | C | T / T | T / T | 17.33 |
| 1405 | 782 / 425 | G | A | R / R | K / K | 0.44  |

|                        |      |                 |   |   |           |           |       |
|------------------------|------|-----------------|---|---|-----------|-----------|-------|
|                        | 1409 | 786 / 429       | G | A | M / M     | I / I     | 4.44  |
|                        | 1412 | 789 / 432       | C | T | D / D     | D / D     | 5.78  |
|                        | 1412 | 789 / 432       | C | G | D / D     | E / E     | 17.33 |
|                        | 1422 | 799 / 442       | C | A | Q / Q     | K / K     | 7.11  |
|                        | 1424 | 801 / 444       | A | G | Q / Q     | Q / Q     | 3.56  |
|                        | 1425 | 802 / 445       | C | G | Q / Q     | E / E     | 5.78  |
|                        | 1427 | 804 / 447       | A | G | Q / Q     | Q / Q     | 2.67  |
|                        | 1429 | 806 / 449       | G | C | S / S     | T / T     | 91.11 |
|                        | 1452 | 829 / 472       | G | A | E / E     | K / K     | 0.44  |
|                        | 1514 | 891 / 534       | A | G | L / L     | L / L     | 19.56 |
| <b>VP2 / VP3 / VP1</b> | 1574 | 951 / 594 / 11  | C | A | N / N / T | K / K / N | 0.89  |
|                        | 1575 | 952 / 595 / 12  | C | A | Q / Q / T | K / K / T | 64.89 |
|                        | 1644 | 1021 / 664 / 81 | A | G | T / T / L | A / A / L | 32.0  |
| <b>VP1</b>             | 1687 | 124             | G | C | V         | L         | 66.22 |
|                        | 1698 | 135             | T | A | I         | I         | 93.33 |
|                        | 1704 | 141             | G | A | E         | E         | 14.22 |
|                        | 1716 | 153             | C | T | F         | F         | 17.78 |
|                        | 1722 | 159             | C | T | N         | N         | 13.33 |
|                        | 1737 | 174             | T | C | D         | D         | 0.89  |
|                        | 1738 | 175             | C | G | P         | A         | 0.44  |
|                        | 1741 | 178             | G | A | D         | N         | 1.33  |
|                        | 1741 | 178             | G | C | D         | H         | 1.78  |
|                        | 1744 | 181             | G | A | E         | K         | 11.11 |
|                        | 1746 | 183             | A | T | E         | D         | 15.11 |
|                        | 1747 | 184             | A | C | N         | H         | 2.22  |
|                        | 1747 | 184             | A | T | N         | Y         | 0.44  |
|                        | 1747 | 184             | A | G | N         | D         | 8.44  |
|                        | 1760 | 197             | T | A | F         | Y         | 15.56 |
|                        | 1765 | 202             | C | G | L         | V         | 1.78  |
|                        | 1766 | 203             | T | A | L         | Q         | 0.89  |
|                        | 1769 | 206             | A | G | K         | R         | 0.89  |
|                        | 1770 | 207             | G | A | K         | K         | 2.22  |
|                        | 1770 | 207             | G | C | K         | N         | 0.89  |
|                        | 1775 | 212             | G | C | S         | T         | 5.78  |
|                        | 1780 | 217             | G | A | E         | K         | 3.11  |
|                        | 1780 | 217             | G | C | E         | Q         | 5.33  |
|                        | 1781 | 218             | A | C | E         | A         | 0.44  |
|                        | 1784 | 221             | A | C | N         | T         | 7.56  |
|                        | 1786 | 223             | G | A | D         | N         | 5.33  |
|                        | 1787 | 224             | A | C | D         | A         | 12.0  |
|                        | 1788 | 225             | C | T | D         | D         | 0.44  |

|      |     |   |   |   |   |       |
|------|-----|---|---|---|---|-------|
| 1792 | 229 | A | C | S | R | 0.89  |
| 1792 | 229 | A | G | S | G | 11.11 |
| 1793 | 230 | G | A | S | N | 12.0  |
| 1794 | 231 | C | A | S | R | 0.44  |
| 1803 | 240 | C | G | S | R | 0.44  |
| 1807 | 244 | G | A | E | K | 0.44  |
| 1807 | 244 | G | C | E | Q | 4.0   |
| 1809 | 246 | G | A | E | E | 67.56 |
| 1809 | 246 | G | C | E | D | 27.11 |
| 1811 | 248 | G | A | R | K | 5.33  |
| 1815 | 252 | A | C | K | N | 0.44  |
| 1824 | 261 | C | T | P | P | 4.44  |
| 1848 | 285 | C | A | P | P | 17.33 |
| 1851 | 288 | C | A | L | L | 8.89  |
| 1851 | 288 | C | G | L | L | 11.11 |
| 1854 | 291 | C | T | P | P | 8.0   |
| 1858 | 295 | T | C | L | L | 4.89  |
| 1860 | 297 | A | G | L | L | 8.0   |
| 1869 | 306 | C | T | D | D | 12.89 |
| 1890 | 327 | G | A | L | L | 19.56 |
| 1905 | 342 | A | G | V | V | 13.78 |
| 1908 | 345 | T | A | T | T | 67.11 |
| 1912 | 349 | C | A | Q | K | 19.11 |
| 1923 | 360 | T | C | V | V | 75.11 |
| 1938 | 375 | C | T | S | S | 14.22 |
| 1960 | 397 | T | G | S | A | 0.89  |
| 1962 | 399 | A | C | S | S | 4.0   |
| 1963 | 400 | C | A | Q | K | 1.33  |
| 1965 | 402 | A | G | Q | Q | 13.33 |
| 1971 | 408 | G | A | V | V | 13.33 |
| 1971 | 408 | G | T | V | V | 4.0   |
| 1977 | 414 | G | A | E | E | 10.67 |
| 1977 | 414 | G | C | E | D | 0.89  |
| 1978 | 415 | C | A | H | N | 19.11 |
| 1980 | 417 | T | A | H | Q | 0.44  |
| 1985 | 422 | G | T | G | V | 1.33  |
| 1986 | 423 | A | T | G | G | 0.44  |
| 1988 | 425 | G | A | G | E | 0.44  |
| 1989 | 426 | A | C | G | G | 16.89 |
| 1989 | 426 | A | T | G | G | 77.33 |
| 1996 | 433 | A | G | I | V | 4.44  |

|      |     |   |   |   |   |       |
|------|-----|---|---|---|---|-------|
| 1998 | 435 | T | C | I | I | 3.56  |
| 1998 | 435 | T | G | I | M | 0.89  |
| 2007 | 444 | T | C | S | S | 12.0  |
| 2013 | 450 | C | T | F | F | 12.0  |
| 2019 | 456 | C | T | F | F | 76.0  |
| 2028 | 465 | A | T | V | V | 88.0  |
| 2028 | 465 | A | G | V | V | 8.44  |
| 2034 | 471 | A | G | G | G | 6.22  |
| 2037 | 474 | A | C | E | D | 97.33 |
| 2054 | 491 | G | C | G | A | 1.33  |
| 2058 | 495 | G | A | V | V | 11.11 |
| 2061 | 498 | A | T | L | L | 12.44 |
| 2067 | 504 | T | C | N | N | 0.89  |
| 2073 | 510 | G | A | R | R | 7.11  |
| 2074 | 511 | T | A | S | T | 93.78 |
| 2076 | 513 | A | C | S | S | 12.44 |
| 2085 | 522 | T | A | P | P | 91.56 |
| 2086 | 523 | G | C | D | H | 5.78  |
| 2088 | 525 | T | A | D | E | 75.56 |
| 2095 | 532 | A | G | I | V | 2.67  |
| 2103 | 540 | T | A | P | P | 86.22 |
| 2106 | 543 | A | G | K | K | 0.44  |
| 2109 | 546 | C | T | N | N | 2.67  |
| 2112 | 549 | A | C | P | P | 0.44  |
| 2112 | 549 | A | T | P | P | 6.22  |
| 2118 | 555 | C | T | A | A | 18.67 |
| 2127 | 564 | G | A | Q | Q | 67.11 |
| 2139 | 576 | T | A | T | T | 0.44  |
| 2140 | 577 | G | A | D | N | 0.89  |
| 2142 | 579 | C | T | D | D | 4.89  |
| 2142 | 579 | C | G | D | E | 0.44  |
| 2154 | 591 | T | C | Y | Y | 13.78 |
| 2172 | 609 | T | C | A | A | 0.44  |
| 2184 | 621 | G | A | E | E | 13.78 |
| 2191 | 628 | G | A | V | I | 75.56 |
| 2193 | 630 | A | T | V | V | 91.56 |
| 2199 | 636 | T | C | D | D | 1.33  |
| 2202 | 639 | C | T | P | P | 12.44 |
| 2218 | 655 | G | A | A | T | 98.22 |
| 2223 | 660 | G | A | R | R | 0.89  |
| 2232 | 669 | G | A | G | G | 18.67 |

|      |      |   |   |   |   |       |
|------|------|---|---|---|---|-------|
| 2235 | 672  | T | A | T | T | 13.33 |
| 2237 | 674  | T | A | F | Y | 18.22 |
| 2238 | 675  | C | T | F | F | 0.89  |
| 2244 | 681  | A | G | G | G | 2.22  |
| 2261 | 698  | C | A | P | Q | 0.44  |
| 2269 | 706  | C | T | H | Y | 0.44  |
| 2274 | 711  | G | A | V | V | 14.22 |
| 2274 | 711  | G | T | V | V | 4.89  |
| 2280 | 717  | C | T | N | N | 1.33  |
| 2301 | 738  | A | G | L | L | 18.67 |
| 2313 | 750  | T | A | G | G | 0.44  |
| 2322 | 759  | T | C | P | P | 4.89  |
| 2325 | 762  | T | A | L | L | 2.67  |
| 2325 | 762  | T | G | L | L | 16.89 |
| 2337 | 774  | T | C | D | D | 2.67  |
| 2370 | 807  | C | A | G | G | 12.44 |
| 2370 | 807  | C | G | G | G | 4.0   |
| 2375 | 812  | T | C | F | S | 0.44  |
| 2385 | 822  | C | A | S | R | 0.44  |
| 2391 | 828  | A | G | G | G | 5.33  |
| 2406 | 843  | A | G | R | R | 15.11 |
| 2413 | 850  | G | C | A | P | 15.11 |
| 2430 | 867  | C | T | I | I | 80.0  |
| 2451 | 888  | A | G | V | V | 5.33  |
| 2454 | 891  | G | A | K | K | 76.89 |
| 2457 | 894  | T | C | N | N | 15.56 |
| 2481 | 918  | A | T | L | L | 15.11 |
| 2481 | 918  | A | G | L | L | 8.44  |
| 2508 | 945  | G | A | Q | Q | 4.89  |
| 2510 | 947  | G | A | R | K | 4.89  |
| 2541 | 978  | A | G | E | E | 14.22 |
| 2544 | 981  | C | T | S | S | 17.33 |
| 2550 | 987  | A | T | V | V | 4.44  |
| 2550 | 987  | A | G | V | V | 10.22 |
| 2553 | 990  | A | G | E | E | 17.78 |
| 2559 | 996  | T | C | V | V | 13.78 |
| 2559 | 996  | T | G | V | V | 5.33  |
| 2562 | 999  | G | A | R | R | 1.33  |
| 2569 | 1006 | G | C | D | H | 0.44  |
| 2581 | 1018 | A | C | R | R | 19.11 |
| 2582 | 1019 | G | A | R | K | 43.56 |



|                   |      |      |   |   |   |   |       |
|-------------------|------|------|---|---|---|---|-------|
|                   | 2583 | 1020 | A | G | R | R | 19.11 |
|                   | 2613 | 1050 | T | C | Y | Y | 0.44  |
|                   | 2619 | 1056 | C | T | D | D | 12.0  |
|                   | 2621 | 1058 | A | G | K | R | 20.44 |
|                   | 2623 | 1060 | C | G | Q | E | 0.44  |
|                   | 2625 | 1062 | G | A | Q | Q | 81.78 |
|                   | 2640 | 1077 | C | A | T | T | 20.0  |
|                   | 2640 | 1077 | C | T | T | T | 11.56 |
|                   | 2647 | 1084 | C | G | L | V | 32.44 |
| <b>Intergenic</b> | 2656 |      | G | A |   |   | 0.44  |
|                   | 2670 |      | A | T |   |   | 64.89 |
|                   | 2671 |      | C | G |   |   | 64.44 |
|                   | 2677 |      | C | T |   |   | 5.33  |
|                   | 2681 |      | T | C |   |   | 4.00  |
|                   | 2684 |      | T | A |   |   | 0.44  |
|                   | 2698 |      | G | A |   |   | 7.55  |
|                   | 2702 |      | A | T |   |   | 0.88  |
|                   | 2704 |      | G | C |   |   | 2.22  |
|                   | 2705 |      | C | A |   |   | 2.22  |
|                   | 2708 |      | C | G |   |   | 81.78 |
|                   | 2709 |      | T | G |   |   | 1.78  |
|                   | 2715 |      | G | T |   |   | 10.22 |
|                   | 2719 |      | G | C |   |   | 3.11  |
| <b>LTA</b>        | 2746 | 2064 | G | A | R | R | 5.33  |
|                   | 2752 | 2058 | T | C | F | F | 0.44  |
|                   | 2758 | 2052 | G | A | Q | Q | 12.89 |
|                   | 2759 | 2051 | A | T | Q | L | 0.44  |
|                   | 2779 | 2031 | G | A | L | L | 20.0  |
|                   | 2782 | 2028 | G | C | E | D | 0.44  |
|                   | 2784 | 2026 | G | C | E | Q | 0.44  |
|                   | 2787 | 2023 | C | G | Q | E | 19.56 |
|                   | 2788 | 2022 | T | C | S | S | 5.33  |
|                   | 2791 | 2019 | T | C | H | H | 4.44  |
|                   | 2794 | 2016 | C | T | P | P | 4.44  |
|                   | 2801 | 2009 | C | T | S | L | 15.11 |
|                   | 2802 | 2008 | T | C | S | P | 14.22 |
|                   | 2802 | 2008 | T | G | S | A | 0.89  |
|                   | 2808 | 2002 | C | A | Q | K | 0.44  |
|                   | 2809 | 2001 | C | A | S | S | 4.0   |
|                   | 2814 | 1996 | G | C | D | H | 0.89  |
|                   | 2817 | 1993 | G | A | E | K | 2.22  |

|      |      |   |   |   |   |       |
|------|------|---|---|---|---|-------|
| 2818 | 1992 | T | A | A | A | 0.89  |
| 2818 | 1992 | T | C | A | A | 1.78  |
| 2830 | 1980 | T | C | T | T | 0.44  |
| 2831 | 1979 | C | A | T | N | 1.78  |
| 2831 | 1979 | C | G | T | S | 0.44  |
| 2842 | 1968 | A | G | Q | Q | 0.44  |
| 2845 | 1965 | C | A | S | S | 3.56  |
| 2849 | 1961 | C | T | S | F | 0.44  |
| 2863 | 1947 | C | A | S | S | 0.89  |
| 2863 | 1947 | C | T | S | S | 13.78 |
| 2868 | 1942 | G | A | E | K | 0.44  |
| 2868 | 1942 | G | C | E | Q | 0.89  |
| 2906 | 1904 | A | G | D | G | 0.44  |
| 2907 | 1903 | G | C | D | H | 0.89  |
| 2908 | 1902 | G | A | E | E | 95.11 |
| 2920 | 1890 | T | A | I | I | 13.78 |
| 2920 | 1890 | T | C | I | I | 71.56 |
| 2938 | 1872 | G | A | G | G | 71.11 |
| 2959 | 1851 | G | A | M | I | 0.44  |
| 2966 | 1844 | C | T | S | L | 0.89  |
| 3012 | 1798 | G | C | E | Q | 0.44  |
| 3025 | 1785 | A | G | Q | Q | 20.44 |
| 3034 | 1776 | T | A | T | T | 99.56 |
| 3035 | 1775 | C | A | T | N | 18.22 |
| 3036 | 1774 | A | C | T | P | 14.22 |
| 3038 | 1772 | C | T | A | V | 2.22  |
| 3039 | 1771 | G | T | A | S | 4.44  |
| 3040 | 1770 | T | C | F | F | 1.33  |
| 3045 | 1765 | G | A | D | N | 0.44  |
| 3058 | 1752 | T | C | F | F | 14.67 |
| 3070 | 1740 | G | T | L | L | 0.44  |
| 3079 | 1731 | G | T | L | F | 1.33  |
| 3081 | 1729 | T | C | L | L | 1.78  |
| 3082 | 1728 | C | T | T | T | 1.33  |
| 3099 | 1711 | T | C | L | L | 44.0  |
| 3100 | 1710 | T | A | I | I | 20.44 |
| 3117 | 1693 | T | C | L | L | 0.89  |
| 3118 | 1692 | C | T | F | F | 25.78 |
| 3121 | 1689 | G | A | E | E | 14.22 |
| 3123 | 1687 | G | A | E | K | 0.89  |
| 3133 | 1677 | A | G | L | L | 19.11 |

|      |      |   |   |   |   |       |
|------|------|---|---|---|---|-------|
| 3135 | 1675 | T | C | L | L | 15.11 |
| 3139 | 1671 | A | G | K | K | 5.78  |
| 3151 | 1659 | A | T | I | I | 10.22 |
| 3157 | 1653 | C | T | P | P | 11.11 |
| 3160 | 1650 | G | A | R | R | 30.22 |
| 3172 | 1638 | A | G | Q | Q | 93.33 |
| 3190 | 1620 | A | G | Q | Q | 95.11 |
| 3195 | 1615 | C | T | L | L | 14.22 |
| 3196 | 1614 | C | T | T | T | 5.33  |
| 3202 | 1608 | T | C | P | P | 13.78 |
| 3205 | 1605 | C | T | V | V | 13.33 |
| 3207 | 1603 | G | T | V | F | 1.33  |
| 3208 | 1602 | T | A | P | P | 3.56  |
| 3210 | 1600 | C | T | P | S | 0.89  |
| 3214 | 1596 | G | A | E | E | 1.78  |
| 3216 | 1594 | G | A | E | K | 0.89  |
| 3216 | 1594 | G | C | E | Q | 0.89  |
| 3229 | 1581 | G | A | L | L | 20.89 |
| 3231 | 1579 | T | C | L | L | 76.0  |
| 3232 | 1578 | C | T | G | G | 14.22 |
| 3232 | 1578 | C | G | G | G | 5.33  |
| 3238 | 1572 | A | T | P | P | 2.67  |
| 3250 | 1560 | C | A | T | T | 5.78  |
| 3265 | 1545 | T | C | H | H | 15.11 |
| 3271 | 1539 | G | A | K | K | 0.44  |
| 3283 | 1527 | A | T | V | V | 95.11 |
| 3286 | 1524 | G | A | K | K | 17.78 |
| 3287 | 1523 | A | G | K | R | 0.44  |
| 3288 | 1522 | A | G | K | E | 0.44  |
| 3289 | 1521 | T | C | V | V | 11.56 |
| 3298 | 1512 | T | C | D | D | 0.44  |
| 3303 | 1507 | T | C | L | L | 5.33  |
| 3310 | 1500 | A | G | R | R | 19.56 |
| 3313 | 1497 | G | A | L | L | 15.56 |
| 3351 | 1459 | T | C | L | L | 2.67  |
| 3367 | 1443 | A | G | G | G | 18.22 |
| 3370 | 1440 | A | T | T | T | 8.89  |
| 3372 | 1438 | G | A | T | A | 0.89  |
| 3373 | 1437 | G | A | G | G | 91.11 |
| 3376 | 1434 | A | G | K | K | 10.67 |
| 3379 | 1431 | A | G | V | V | 11.56 |

|      |      |   |   |   |   |       |
|------|------|---|---|---|---|-------|
| 3400 | 1410 | C | T | Y | Y | 14.67 |
| 3415 | 1395 | A | G | V | V | 17.78 |
| 3421 | 1389 | A | G | L | L | 12.44 |
| 3424 | 1386 | G | A | E | E | 93.78 |
| 3430 | 1380 | C | T | T | T | 6.67  |
| 3433 | 1377 | A | T | L | L | 2.22  |
| 3433 | 1377 | A | G | L | L | 14.22 |
| 3450 | 1360 | C | T | L | L | 2.67  |
| 3451 | 1359 | C | T | N | N | 6.67  |
| 3454 | 1356 | A | T | V | V | 0.89  |
| 3454 | 1356 | A | G | V | V | 3.11  |
| 3463 | 1347 | C | T | A | A | 80.89 |
| 3469 | 1341 | T | C | G | G | 4.44  |
| 3472 | 1338 | T | A | G | G | 99.56 |
| 3478 | 1332 | G | A | L | L | 19.56 |
| 3481 | 1329 | T | C | D | D | 5.33  |
| 3490 | 1320 | G | A | G | G | 0.44  |
| 3501 | 1309 | C | T | L | L | 5.33  |
| 3502 | 1308 | A | C | T | T | 5.33  |
| 3511 | 1299 | A | C | G | G | 5.33  |
| 3523 | 1287 | C | A | P | P | 20.44 |
| 3523 | 1287 | C | T | P | P | 0.44  |
| 3532 | 1278 | T | C | F | F | 13.33 |
| 3562 | 1248 | C | T | F | F | 94.67 |
| 3570 | 1240 | A | G | I | V | 4.89  |
| 3577 | 1233 | G | T | L | F | 0.89  |
| 3579 | 1231 | T | C | L | L | 16.0  |
| 3580 | 1230 | T | C | F | F | 15.11 |
| 3589 | 1221 | A | T | I | I | 5.33  |
| 3592 | 1218 | A | T | V | V | 100.0 |
| 3612 | 1198 | C | T | L | L | 12.44 |
| 3619 | 1191 | C | T | H | H | 5.33  |
| 3622 | 1188 | G | A | L | L | 3.56  |
| 3628 | 1182 | T | C | A | A | 15.56 |
| 3634 | 1176 | T | A | G | G | 15.11 |
| 3634 | 1176 | T | G | G | G | 5.33  |
| 3649 | 1161 | A | G | E | E | 0.44  |
| 3652 | 1158 | A | G | L | L | 12.44 |
| 3654 | 1156 | C | T | L | L | 65.78 |
| 3670 | 1140 | T | C | A | A | 0.44  |
| 3673 | 1137 | A | G | G | G | 65.78 |

|      |      |   |   |   |   |       |
|------|------|---|---|---|---|-------|
| 3684 | 1126 | T | A | L | I | 0.44  |
| 3709 | 1101 | C | T | F | F | 95.11 |
| 3715 | 1095 | A | C | E | D | 14.67 |
| 3733 | 1077 | G | A | R | R | 89.78 |
| 3736 | 1074 | C | T | T | T | 64.89 |
| 3745 | 1065 | T | C | L | L | 14.22 |
| 3749 | 1061 | C | G | T | S | 65.78 |
| 3757 | 1053 | A | G | R | R | 14.22 |
| 3763 | 1047 | A | G | K | K | 5.33  |
| 3767 | 1043 | C | G | A | G | 0.44  |
| 3772 | 1038 | T | G | V | V | 14.67 |
| 3781 | 1029 | A | G | V | V | 14.67 |
| 3790 | 1020 | G | A | Q | Q | 4.0   |
| 3826 | 984  | T | A | I | I | 9.78  |
| 3826 | 984  | T | C | I | I | 58.67 |
| 3829 | 981  | T | C | I | I | 12.89 |
| 3830 | 980  | T | C | I | T | 88.89 |
| 3831 | 979  | A | G | I | V | 0.44  |
| 3844 | 966  | C | T | H | H | 94.22 |
| 3859 | 951  | G | A | K | K | 12.89 |
| 3868 | 942  | T | C | Y | Y | 17.33 |
| 3871 | 939  | T | C | P | P | 11.56 |
| 3874 | 936  | G | A | Q | Q | 100.0 |
| 3886 | 924  | G | A | Q | Q | 21.78 |
| 3904 | 906  | G | A | E | E | 12.0  |
| 3906 | 904  | G | C | E | Q | 0.44  |
| 3916 | 894  | A | G | Q | Q | 14.22 |
| 3919 | 891  | T | C | F | F | 0.89  |
| 3924 | 886  | G | C | E | Q | 0.89  |
| 3934 | 876  | T | A | G | G | 5.33  |
| 3937 | 873  | A | G | L | L | 32.0  |
| 3941 | 869  | T | A | L | * | 0.44  |
| 3942 | 868  | T | A | L | I | 1.33  |
| 3942 | 868  | T | C | L | L | 8.44  |
| 3945 | 865  | T | C | L | L | 5.33  |
| 3949 | 861  | G | C | V | V | 5.33  |
| 3955 | 855  | G | A | E | E | 8.44  |
| 3967 | 843  | G | A | E | E | 73.78 |
| 3970 | 840  | A | G | V | V | 0.89  |
| 3979 | 831  | G | A | E | E | 15.56 |
| 3985 | 825  | T | A | I | I | 12.89 |

|      |     |   |   |   |   |       |
|------|-----|---|---|---|---|-------|
| 3997 | 813 | T | C | S | S | 19.56 |
| 4000 | 810 | G | C | V | V | 65.33 |
| 4006 | 804 | G | A | K | K | 0.44  |
| 4021 | 789 | G | A | E | E | 11.11 |
| 4024 | 786 | A | G | E | E | 15.11 |
| 4031 | 779 | G | A | S | N | 94.22 |
| 4036 | 774 | T | C | D | D | 5.33  |
| 4045 | 765 | G | A | K | K | 0.44  |
| 4050 | 760 | T | C | L | L | 16.89 |
| 4059 | 751 | C | A | Q | K | 4.44  |
| 4063 | 747 | C | T | S | S | 11.56 |
| 4069 | 741 | A | G | E | E | 14.22 |
| 4075 | 735 | T | A | T | T | 94.22 |
| 4076 | 734 | C | T | T | I | 6.67  |
| 4080 | 730 | C | T | H | Y | 1.78  |
| 4081 | 729 | C | T | Y | Y | 2.67  |
| 4087 | 723 | T | A | D | E | 1.78  |
| 4087 | 723 | T | G | D | E | 4.44  |
| 4090 | 720 | A | G | R | R | 5.78  |
| 4099 | 711 | C | T | A | A | 1.78  |
| 4105 | 705 | T | C | Y | Y | 17.78 |
| 4108 | 702 | A | G | L | L | 2.22  |
| 4111 | 699 | A | G | L | L | 0.44  |
| 4153 | 657 | C | T | T | T | 19.56 |
| 4174 | 636 | T | C | N | N | 5.78  |
| 4203 | 607 | C | A | H | N | 0.44  |
| 4213 | 597 | T | C | F | F | 6.67  |
| 4216 | 594 | C | T | F | F | 0.44  |
| 4219 | 591 | A | T | I | I | 0.89  |
| 4231 | 579 | G | T | G | G | 19.56 |
| 4252 | 558 | T | C | I | I | 5.33  |
| 4270 | 540 | A | G | K | K | 5.33  |
| 4293 | 517 | C | T | L | L | 4.0   |
| 4298 | 512 | A | T | Q | L | 14.22 |
| 4299 | 511 | C | T | Q | * | 14.22 |
| 4299 | 511 | C | G | Q | E | 0.89  |
| 4315 | 495 | T | C | T | T | 6.22  |
| 4330 | 480 | C | T | C | C | 3.56  |
| 4336 | 474 | T | C | L | L | 28.44 |
| 4339 | 471 | C | A | T | T | 4.0   |
| 4339 | 471 | C | T | T | T | 7.11  |

|                   |      |   |   |   |   |       |
|-------------------|------|---|---|---|---|-------|
| 4363              | 447  | T | C | S | S | 0.89  |
| 4380              | 430  | C | T | L | L | 0.44  |
| 4385              | 425  | C | T | S | F | 0.89  |
| 4385              | 425  | C | G | S | C | 0.44  |
| 4387              | 423  | C | T | P | P | 88.44 |
| 4411              | 399  | G | A | K | K | 0.44  |
| 4417              | 393  | A | G | K | K | 12.89 |
| 4423              | 387  | A | G | K | K | 83.56 |
| 4427              | 383  | C | A | P | H | 13.78 |
| 4435              | 375  | A | C | S | S | 12.89 |
| 4435              | 375  | A | T | S | S | 0.89  |
| 4436              | 374  | C | G | S | * | 0.44  |
| 4444              | 366  | T | C | S | S | 17.78 |
| 4457              | 353  | C | A | A | E | 0.44  |
| 4459              | 351  | A | G | E | E | 12.44 |
| 4462              | 348  | A | G | E | E | 12.44 |
| 4471              | 339  | C | A | A | A | 0.44  |
| 4471              | 339  | C | T | A | A | 0.44  |
| 4473              | 337  | G | A | A | T | 0.44  |
| 4483              | 327  | A | G | E | E | 4.89  |
| 4488              | 322  | C | A | H | N | 1.33  |
| 4492              | 318  | T | C | F | F | 17.33 |
| 4498              | 312  | T | C | D | D | 5.78  |
| 4517              | 293  | A | T | N | I | 0.44  |
| 4522              | 288  | C | T | S | S | 0.44  |
| 4525              | 285  | T | C | S | S | 18.22 |
| 4525              | 285  | T | G | S | R | 12.0  |
| 4534              | 276  | C | T | S | S | 26.67 |
| 4545              | 265  | G | C | E | Q | 0.44  |
| 4564              | 246  | G | A | V | V | 0.44  |
| <b>LTA intron</b> | 4570 | T | C |   |   | 0.44  |
|                   | 4575 | A | C |   |   | 68.44 |
|                   | 4580 | A | T |   |   | 0.44  |
|                   | 4589 | G | A |   |   | 2.22  |
|                   | 4595 | T | C |   |   | 0.44  |
|                   | 4597 | T | A |   |   | 92.00 |
|                   | 4598 | A | T |   |   | 1.33  |
|                   | 4606 | A | C |   |   | 8.44  |
|                   | 4606 | A | T |   |   | 8.00  |
|                   | 4613 | A | C |   |   | 4.00  |
|                   | 4620 | T | G |   |   | 12.44 |

|                         |      |           |   |   |       |       |       |
|-------------------------|------|-----------|---|---|-------|-------|-------|
|                         | 4625 |           | G | A |       |       | 18.22 |
|                         | 4626 |           | T | G |       |       | 67.56 |
| <b>LTA intron / stA</b> | 4653 | - / 501   | C | G | - / F | - / L | 0.44  |
|                         | 4662 | - / 492   | A | G | - / E | - / E | 12.44 |
|                         | 4664 | - / 490   | G | C | - / E | - / Q | 0.44  |
|                         | 4666 | - / 488   | G | A | - / G | - / E | 1.33  |
|                         | 4677 | - / 477   | C | T | - / V | - / V | 1.78  |
|                         | 4692 | - / 462   | T | C | - / T | - / T | 4.89  |
|                         | 4704 | - / 450   | A | C | - / L | - / L | 4.89  |
|                         | 4715 | - / 439   | G | T | - / G | - / C | 0.44  |
|                         | 4724 | - / 430   | C | G | - / Q | - / E | 5.78  |
|                         | 4726 | - / 428   | C | G | - / T | - / R | 5.33  |
|                         | 4734 | - / 420   | C | T | - / D | - / D | 4.89  |
|                         | 4764 | - / 390   | C | A | - / P | - / P | 4.89  |
|                         | 4791 | - / 363   | A | T | - / L | - / F | 0.44  |
|                         | 4797 | - / 357   | G | A | - / R | - / R | 12.44 |
|                         | 4806 | - / 348   | T | A | - / L | - / L | 16.89 |
|                         | 4809 | - / 345   | G | A | - / Q | - / Q | 0.44  |
|                         | 4815 | - / 339   | A | G | - / L | - / L | 12.0  |
|                         | 4830 | - / 324   | C | T | - / H | - / H | 4.89  |
|                         | 4836 | - / 318   | T | A | - / S | - / S | 17.33 |
|                         | 4854 | - / 300   | T | C | - / I | - / I | 0.89  |
|                         | 4863 | - / 291   | A | T | - / E | - / D | 13.33 |
|                         | 4877 | - / 277   | C | T | - / L | - / L | 4.89  |
|                         | 4878 | - / 276   | C | T | - / T | - / T | 4.89  |
|                         | 4894 | - / 260   | C | A | - / P | - / H | 0.44  |
| <b>LTA / stA</b>        | 4915 | 239 / 239 | C | T | S / S | L / L | 0.44  |
|                         | 4921 | 233 / 233 | G | A | S / S | N / N | 4.89  |
|                         | 4944 | 210 / 210 | T | C | H / H | H / H | 13.33 |
|                         | 4962 | 192 / 192 | G | A | Q / Q | Q / Q | 67.56 |
|                         | 4980 | 174 / 174 | G | A | L / L | L / L | 99.56 |
|                         | 5036 | 118 / 118 | G | C | E / E | Q / Q | 0.89  |
|                         | 5046 | 108 / 108 | G | A | R / R | R / R | 17.33 |
|                         | 5047 | 107 / 107 | G | A | R / R | K / K | 4.89  |
|                         | 5055 | 99 / 99   | T | C | A / A | A / A | 94.67 |
|                         | 5061 | 93 / 93   | A | G | R / R | R / R | 12.44 |
|                         | 5069 | 85 / 85   | T | C | L / L | L / L | 2.67  |
|                         | 5072 | 82 / 82   | C | A | P / P | T / T | 0.44  |
|                         | 5076 | 78 / 78   | T | C | N / N | N / N | 92.44 |
|                         | 5097 | 57 / 57   | T | A | L / L | L / L | 10.67 |
|                         | 5103 | 51 / 51   | A | G | L / L | L / L | 61.33 |



|      |         |   |   |       |       |       |
|------|---------|---|---|-------|-------|-------|
| 5115 | 39 / 39 | C | G | L / L | L / L | 0.89  |
| 5125 | 29 / 29 | C | A | S / S | Y / Y | 0.44  |
| 5127 | 27 / 27 | A | G | E / E | E / E | 0.89  |
| 5130 | 24 / 24 | A | G | E / E | E / E | 16.44 |
| 5139 | 15 / 15 | T | A | L / L | L / L | 11.56 |
| 5142 | 12 / 12 | T | G | V / V | V / V | 90.22 |

---
