# Supplementary material for: An unusually high substitution rate in transplant-associated BK polyomavirus in vivo is further concentrated in HLA-C-bound viral peptides
Source: PubMed Central journal article supplement (PMC6207329; doi:10.1371/journal.ppat.1007368), 2018-10-18
Supplement: ppat.1007368.s006.pdf [file ppat.1007368.s006.pdf]

| <b>Model</b>                         | <b>Median</b>         | <b>95% HDI</b>                                |
|--------------------------------------|-----------------------|-----------------------------------------------|
| Strict Constant                      | $6.25 \times 10^{-5}$ | $[6.85 \times 10^{-6} - 1.32 \times 10^{-4}]$ |
| Relaxed Log-Normal Constant          | $1.51 \times 10^{-4}$ | $[1.71 \times 10^{-5} - 3.43 \times 10^{-4}]$ |
| Relaxed Exponential Constant         | $1.82 \times 10^{-4}$ | $[1.06 \times 10^{-5} - 4.24 \times 10^{-4}]$ |
| Strict Bayesian Skyline              | $4.80 \times 10^{-5}$ | $[7.11 \times 10^{-6} - 1.05 \times 10^{-4}]$ |
| Relaxed Log-Normal Bayesian Skyline  | $9.64 \times 10^{-5}$ | $[1.00 \times 10^{-5} - 2.15 \times 10^{-4}]$ |
| Relaxed Exponential Bayesian Skyline | $1.09 \times 10^{-4}$ | $[1.12 \times 10^{-5} - 2.70 \times 10^{-4}]$ |
